# Supplementary material for: The RNA dependent DNA methylation pathway is required to restrict SPOROCYTELESS/NOZZLE expression to specify a single female germ cell precursor in Arabidopsis
Source: Oxford University Press journal article supplement (doi:10.1242/dev.194274), 2020-01-01
Supplement: dev194274supp.pdf [file dev194274supp.pdf]

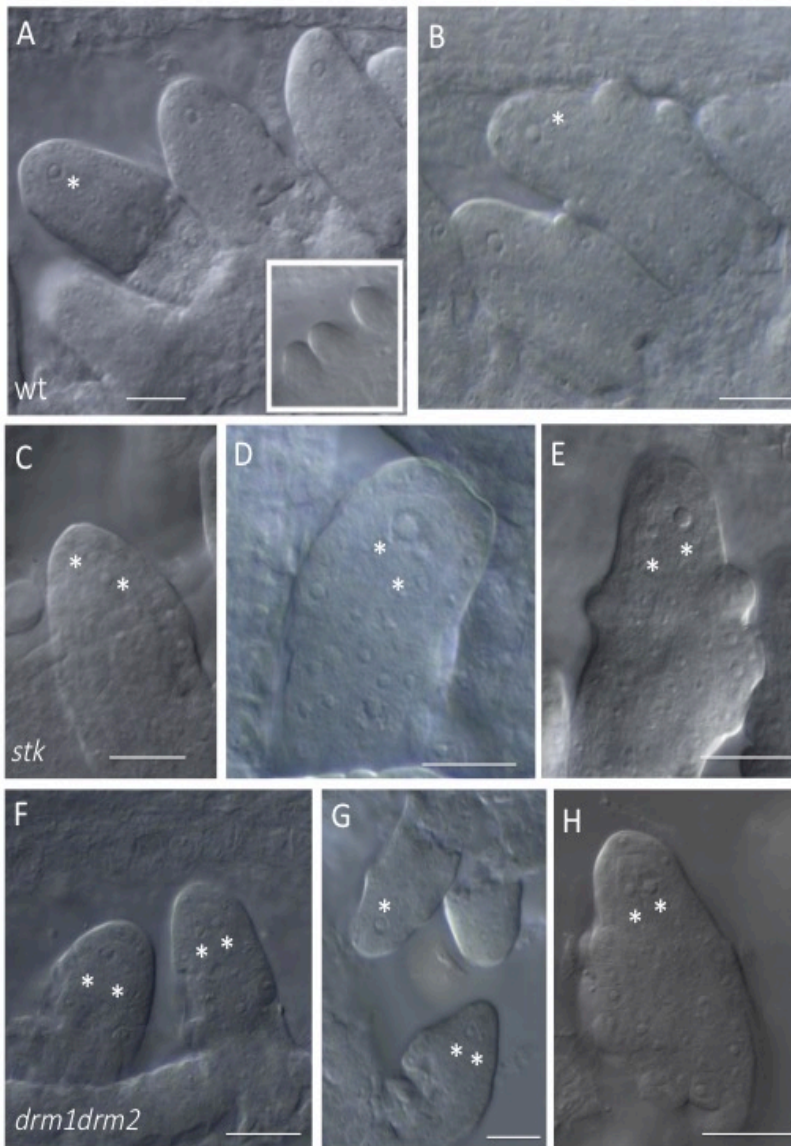

**Figure S1. DIC analysis of ovule primordium.** (A-B) wild-type, during the first stages of ovule primordia development any enlarged cell are detected - small detail in A, only after the ovule elongation, at finger like stage, a single enlarged cell is detectable corresponding to the MMC is detectable; (C-F) *stk* mutant; (G-I) *drm1drm2* double mutant. Multiple enlarged cells - MMC-like cells - were detected in several mutant ovules nucellus and are marked with a white asterisks.

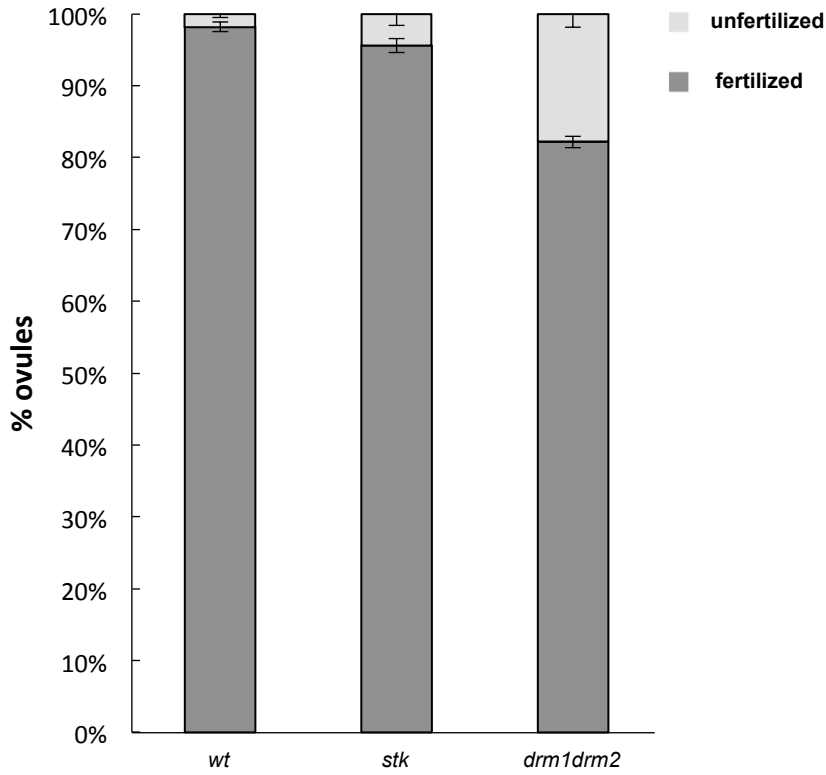

**Figure S2. Fertility analyses in the selected mutants.** The number of fertilized and unfertilized ovules were counted in *stk* mutant and *drm1drm2* double mutant in comparison with wild-type.

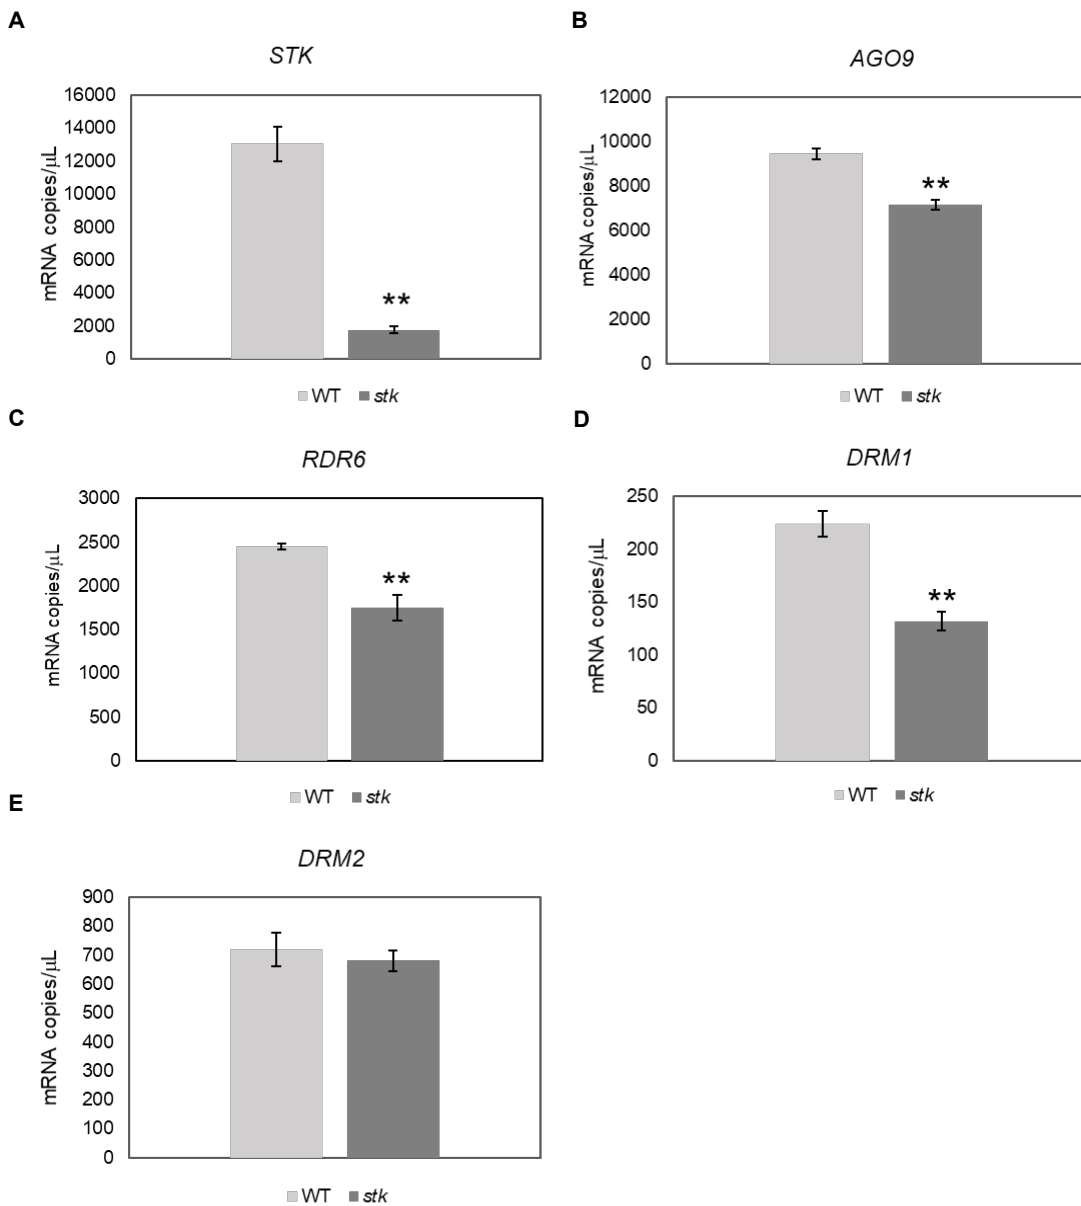

**Figure S3. Gene expression analysis in *wt* and *stk* inflorescences and flowers.** (A-E) Quantitative PCR was used to examine expression of *STK*, *AGO9*, *RDR6*, *DRM1* and *DRM2* in whole inflorescences. Asterisks (\*\*) indicate significant differences in *stk* compared to *wt* and represent a  $p$ -value  $< 0.01$  in a Student's t-test.

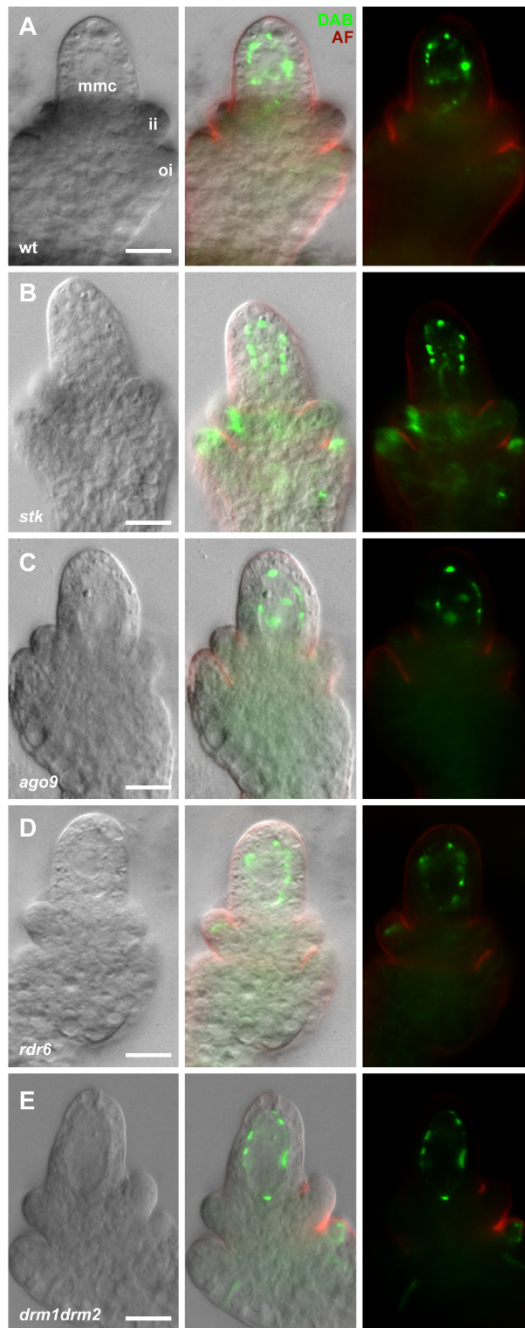

**Figure S4. Callose accumulation during megaspore mother cell expansion.**

Ovule from wt (A), *stk* (B), *ago9* (C) *rdr6* (D) and *drm1drm2* (E) mutant backgrounds were stained with decolourised aniline blue (DAB) and examined at stage 2-I (MMC stage); representative ovules are shown. Callose staining is indicated in green, while autofluorescence (AF) is indicated in red; ii, inner integument; mmc, megaspore mother cell; oi, outer integument. Scale bar = 12µm.

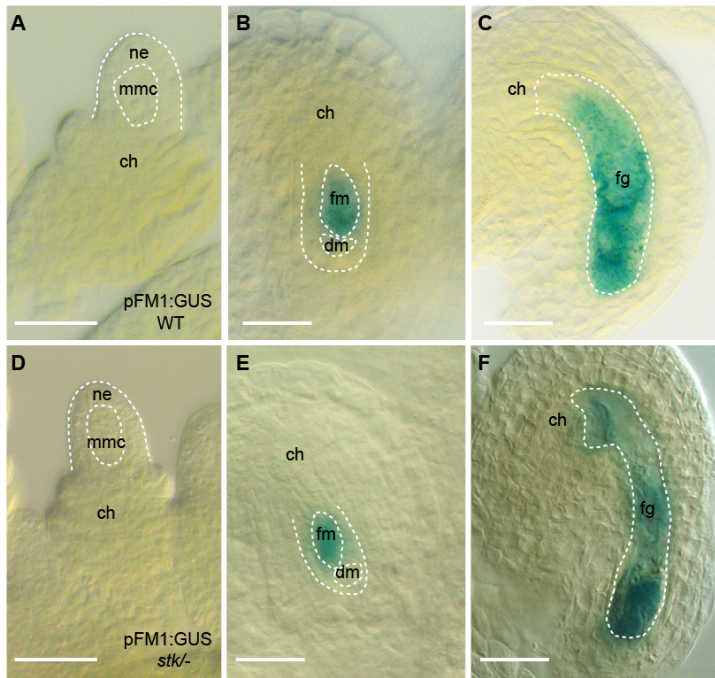

**Figure S5. *pFM1::GUS* expression analysis.** (A-C) In wild-type the marker is absent at the MMC stage and it is only detectable at the functional megaspore (fm) and in the developing female gametophyte (fg). (D-F) In *stk* mutant any differences were detected.

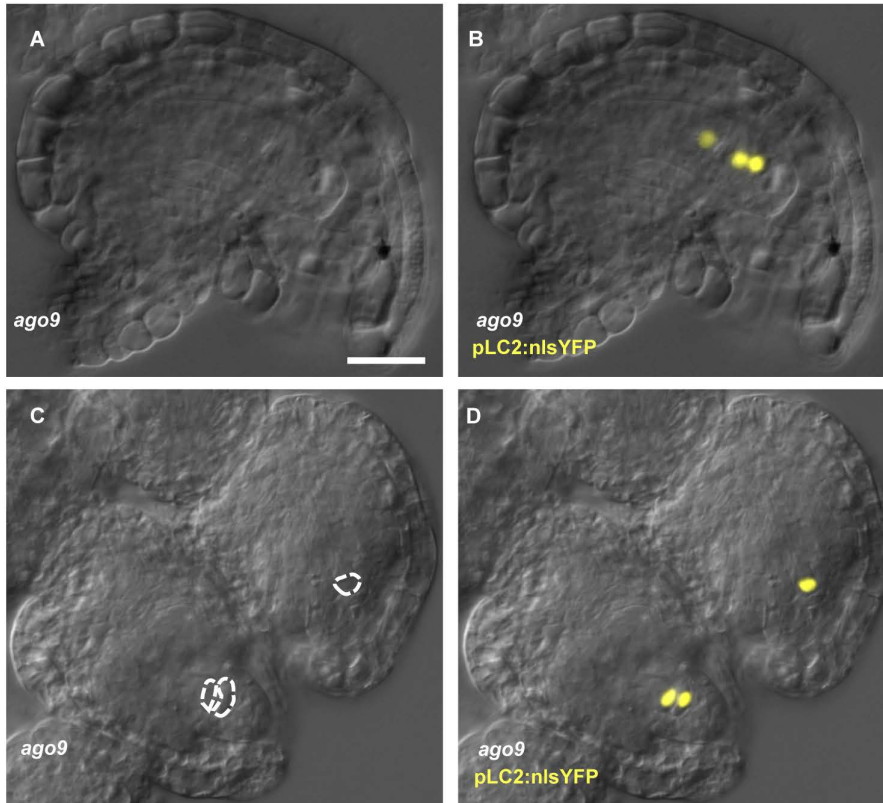

**Figure S6. *pLC2:nlsYFP* expression in *ago9-2* mutant.**

*pLC2:nlsYFP* marker in wild-type (A) and *ago9-2* single mutant (B). Inactivation of AGO9, leads to subtle changes in *pLC2:nlsYFP* expression in less than 2% (9/440) of the analyzed ovules. Two signal sources were detected; however, it was unclear whether this signal was in one functional megaspore and one supernumerary enlarged cell, or two megaspores within the meiotic tetrad.

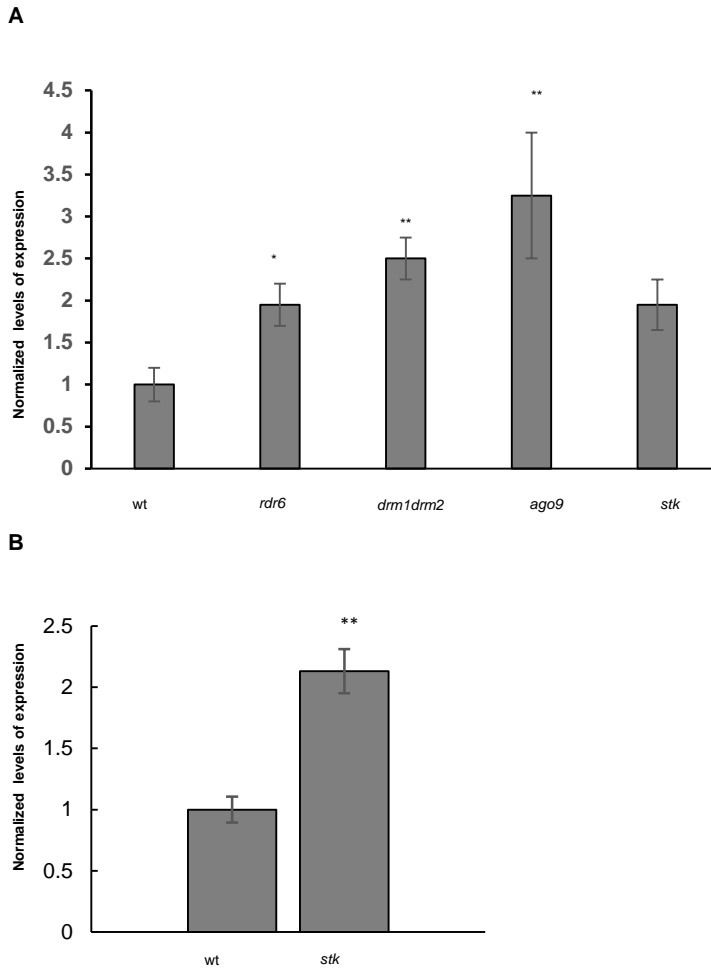

**Figure S7. qRT-PCR analysis of *SPL/NZZ* expression.** (A) Expression analysis of *SPL/NZZ* by qRT-PCR in wild-type, *rdr6*, *drm1drm2*, *ago9* and *stk* closed flowers. The expression of *SPL* was normalized to that of ubiquitin and the expression level in wild-type was set to 1. Error bars represent the standard error mean of three biological replicates; analysis of variance (ANOVA) and post-hoc Tukey honestly significant difference (HSD) test were used; Asterisks (\*) and (\*\*) indicate significant differences in the mutants background compared to the wild-type and represent a  $p$ -value  $< 0.05$  and  $p < 0.01$ , respectively. (B) Expression analysis of *SPL/NZZ* by qRT-PCR in wild-type and *stk* mutants in selected stages, encompassing megasporogenesis. Asterisks (\*\*) indicate significant differences in the mutant background compared to the wild-type and represent a  $p$ -value  $< 0.0$

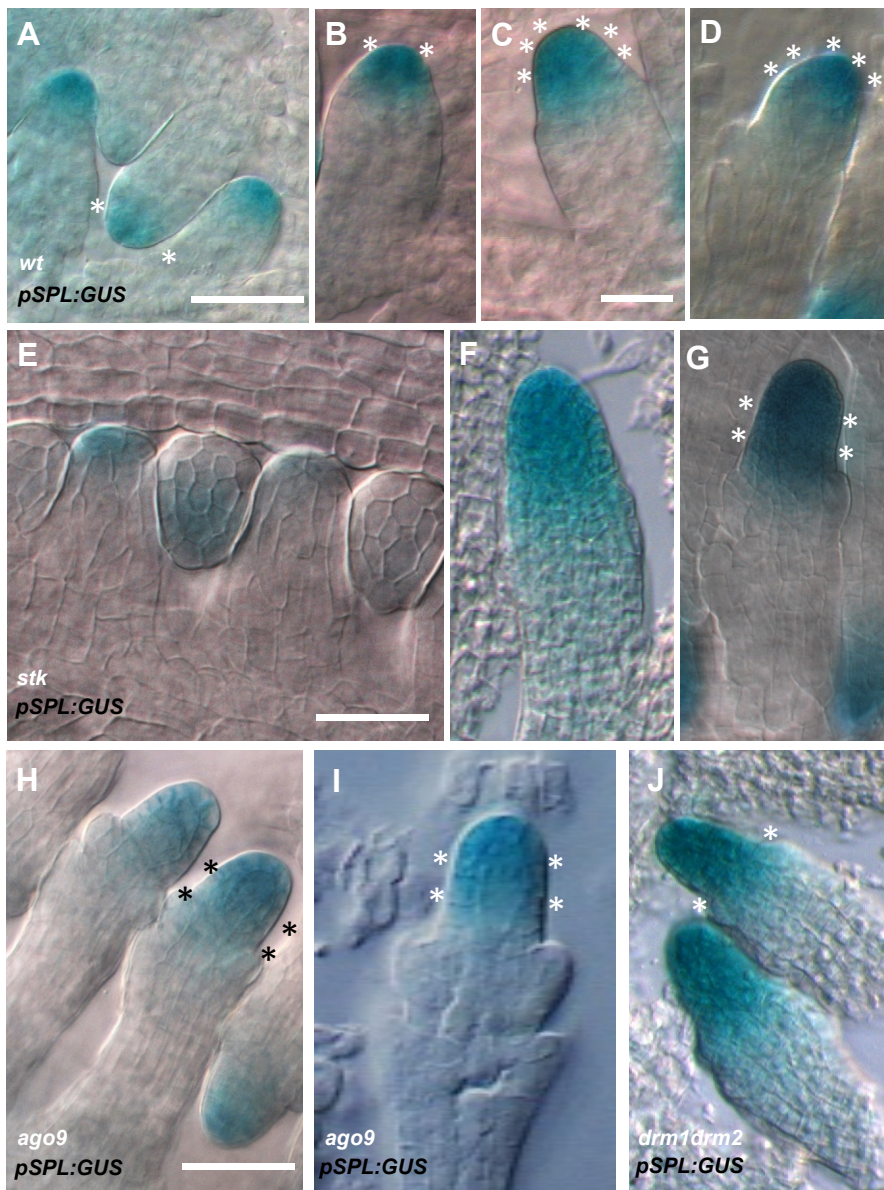

**Figure S8.** Mutation in STK and in the rdDM pathway affects pSPL expression domain. Analysis of *pNZZ/SPL5'::GUS:3'* expression in wt (A-D); *stk* (E-G), *drm1drm2*, *ago9-2* (H-I) and *drm1drm2* (J) mutants background; scale bar= 15 μm. Asterisks highlight the specific expression domain of pSPL, confined to L1 nucella; in the mutant backgrounds analysed we could observe an extension of the domain, no longer restricted to tip of the nucellus.



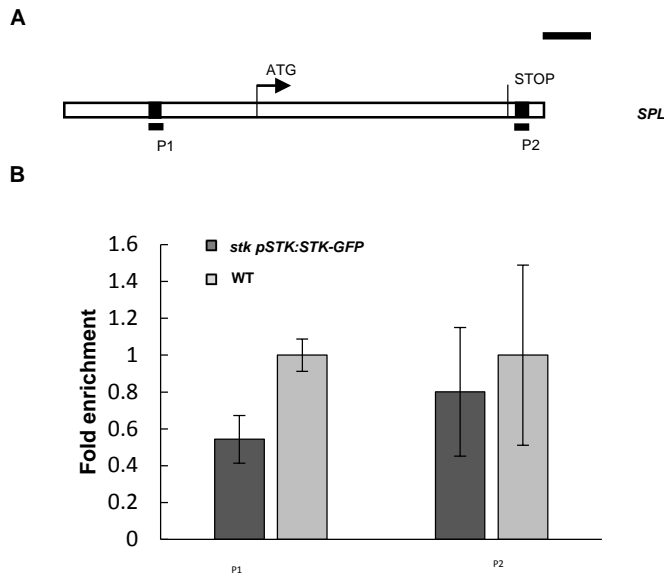

**Figure S9. STK do not directly bind to the *SPL* locus.** (A) Schematic diagram of the *SPL* locus, indicating the regions analysed by chromatin immunoprecipitation (ChIP; black bars); black boxes, CArG boxes; scale bar =500 bp. (B); Quantitative Real-Time PCR analysis of ChIP assay using chromatin extracted from *pSTK::STK\_GFP* and wt (as a negative control), testing the CArG boxes regions on *SPL* locus. For the IP, commercial antibodies against GFP were used; Error bars represent the propagated error value using three replicates. ChIP results of one representative experiment are shown. Positive binding site fragments were considered only if they were enriched compared with the controls in at least three independent experiments.

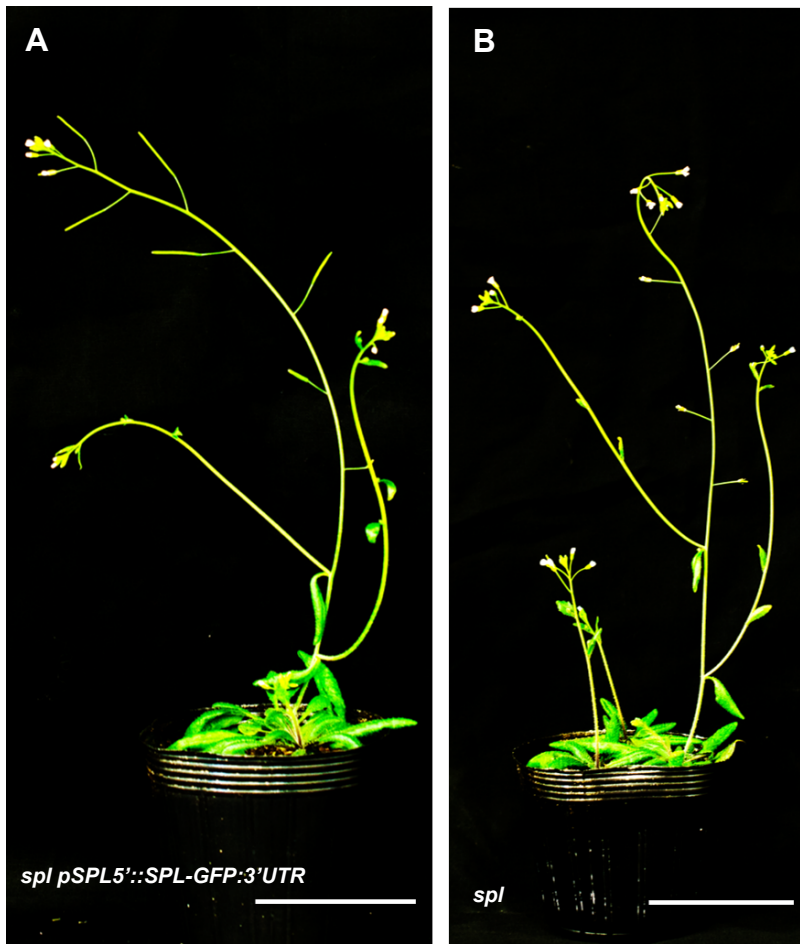

**Figure S10. Complementation analysis.** (A) *spl/nzz* mutant complemented with *pSPL5'UTR::SPL-GFP:3'UTR*; (B) *spl* mutant; scale bar=5 cm.

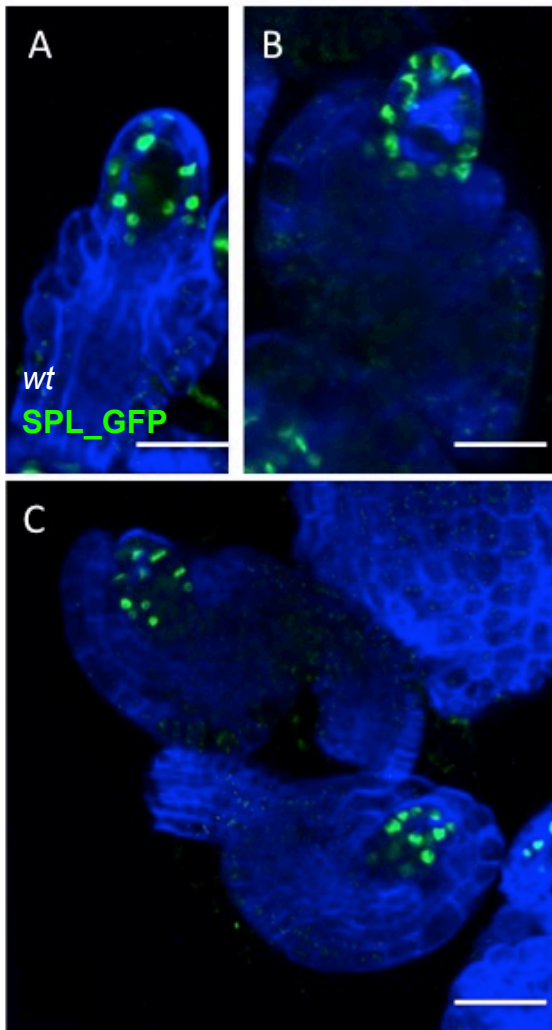

**Figure S11. *SPL\_GFP* expression analysis during meiosis.** Analysis of SPL/NZZ protein localization using *pSPL\_5'UTR::SPL-GFP\_3'UTR*. (A-C) In wild-type SPL expression during meiosis is restricted to the layers that involve the MMC that goes in meiosis. In blue Renaissance staining.

Table S1. *pKNU::nlsYFP* analysis in all mutant backgrounds

| Mutant          | Single cell | Two cells with expression | No expression (or v. weak) | Total |
|-----------------|-------------|---------------------------|----------------------------|-------|
| <i>stk</i>      | 290         | 0                         | 178                        | 468   |
|                 | <b>62%</b>  | <b>0%</b>                 | <b>38%</b>                 |       |
| <i>SD</i>       | 3%          |                           | 2%                         |       |
| <i>wt</i>       | 411         | 0                         | 51                         | 462   |
|                 | <b>89%</b>  | <b>0%</b>                 | <b>11%</b>                 |       |
| <i>SD</i>       | 2%          |                           | 2%                         |       |
| <i>drm1drm2</i> | 349         | 0                         | 222                        | 571   |
|                 | <b>61%</b>  | <b>0%</b>                 | <b>39%</b>                 |       |
| <i>SD</i>       | 3%          |                           | 2%                         |       |
| <i>wt</i>       | 142         | 0                         | 11                         | 152   |
|                 | <b>93%</b>  | <b>0%</b>                 | <b>7%</b>                  |       |
| <i>SD</i>       | 3%          |                           | 2%                         |       |
| <i>ago9-2</i>   | 623         | 12                        | 48                         | 683   |
|                 | <b>91%</b>  | <b>2%</b>                 | <b>7%</b>                  |       |
| <i>SD</i>       | 3%          | 0.5%                      | 2%                         |       |
| <i>wt</i>       | 659         | 15                        | 14                         | 688   |
|                 | <b>96%</b>  | <b>2%</b>                 | <b>2%</b>                  |       |
| <i>SD</i>       | 1%          | 0.5%                      | 2%                         |       |
| <i>rdr6-11</i>  | 280         | 0                         | 70                         | 350   |
|                 | <b>80%</b>  | <b>0%</b>                 | <b>20%</b>                 |       |
| <i>SD</i>       | 3%          |                           | 3%                         |       |
| <i>wt</i>       | 99          | 0                         | 11                         | 110   |
|                 | <b>90%</b>  | <b>0%</b>                 | <b>10%</b>                 |       |
| <i>SD</i>       | 1%          |                           | 2%                         |       |

**Table S2. Mutant and marker lines of *Arabidopsis* used in this study**

| Mutant          | AT*G                         | Allele         | Line        |
|-----------------|------------------------------|----------------|-------------|
| <i>drm1drm2</i> | AT5G15380<br>( <i>DRM1</i> ) | <i>drm1-2</i>  | SALK_021316 |
|                 | AT5G14620<br>( <i>DRM2</i> ) | <i>drm2-2</i>  | SALK_150863 |
| <i>ago9-2</i>   | AT5G21150                    | <i>ago9-2</i>  | SALK_112059 |
| <i>spl</i>      | AT4G27330                    | <i>spl-1</i>   | T-DNA       |
| <i>stk</i>      | AT4G09960                    | <i>stk-2</i>   | TE          |
| <i>rdr6-11</i>  | AT3G49500                    | <i>rdr6-11</i> | N24285      |

| Marker line      | Publication            |
|------------------|------------------------|
| <i>pKNU::YFP</i> | Tucker et al.,<br>2012 |
| <i>pLC2::YFP</i> | Tucker et al.,<br>2012 |

**Table S3. Primers used for qPCR experiments**

| Gene name            | Gene      | Sequence                                               | Amplicon size | Acquisition temperature |
|----------------------|-----------|--------------------------------------------------------|---------------|-------------------------|
| <i>AGO9</i>          | AT5G21150 | CACCTTTCGTTCCAGCAAAT<br>CCGCTTGGTTTGTGAACTT            | 154           | 79°C                    |
| <i>RDR6</i>          | AT3G49500 |                                                        | 187           | 75°C                    |
| <i>SPL/NZZ</i>       | AT4G27330 | CTTGGGAAGCCTTGTAGCAC<br>AGCTCGAGCGTCAGAGAATC           | 148           | 75°C                    |
| <i>DRM1</i>          | AT5G15380 | CCAATTCCGGATATTGCTCGTG<br>TTGGCCCAAACACCTTTTGG         | 80            | 75°C                    |
| <i>DRM2</i>          | AT5G14620 | TGTGCTGCTCAAATGGCTAG<br>GCTCTCCTTTTACTCAAACCG          | 106           | 75°C                    |
| <i>AtCyclophilin</i> | AT2G36130 | TGGCGAACGCTGGTCCTAATACA<br>GTCAGCCAAGTCAACAACCTCTCTG   | 223           | 79°C                    |
| <i>AtGAPdH</i>       | AT3G26650 | TGGTTGATCTCGTTGTGCAGGTCTC<br>GTCAGCCAAGTCAACAACCTCTCTG | 262           | 79°C                    |
| <i>AtActin</i>       | AT5G43500 | GAGTTCTTCACGCGATACCTCCA<br>GACCACCTTTATTAACCCCATTTACCA | 180           | 79°C                    |
| <i>AtTubulin</i>     | AT1G50010 | ATGTGGGTCAGGGTATGGAA                                   | 143           | 79°C                    |

**Table S4. Primers used in ChIP experiments**

| Primer name | Gene      | Sequence                    | Amplificate size | Objective                      |
|-------------|-----------|-----------------------------|------------------|--------------------------------|
| RT_2905     | AT5G21150 | GTCACATCACGTAAATCA          | 178              | <i>pAGO9</i>                   |
| RT_2905     |           | GTGGAAACTGTTTAACC           |                  | region 1                       |
| RT_2907     | AT5G21150 | AACGACGACCTGCAAAC           | 300              | <i>pAGO9</i>                   |
| RT_2908     |           | TGTCATCACCTCAAATTTG         |                  | region 2                       |
| RT_2909     | AT5G21150 | CACAATTGTTTATTGGAACAC       | 137              | <i>pAGO9</i>                   |
| RT_2910     |           | CACAAAAAGAGCTATATGAAC       |                  | region 3                       |
| RT_2911     | AT5G21150 | GAACAACATCTTTAGCAC          | 220              | <i>pAGO9</i>                   |
| RT_2912     |           | CAGGTACTTAAACCGGTTATTC      |                  | region 4                       |
| RT_2293     | AT3G49500 | CCTTCAGTCTGTTCTCTGTTGCT     | 180              | <i>pRDR6</i>                   |
| RT_2294     |           | TGTGCTGCTCACGTGCTATT        |                  | region 1                       |
| RT_2295     | AT3G49500 | CAGTCTCCGCATTGCTTCTAT       | 150              | <i>pRDR6</i>                   |
| RT_2296     |           | CGATCACCTAATAACATTGTTGATTG  |                  | region 2                       |
| RT_2297     | AT3G49500 | CAATCAACAATGTATTAGGTGATCG   | 110              | <i>pRDR6</i>                   |
| RT_2298     |           | CGCTACTCCGTTGGAAGATC        |                  | region 3                       |
| RT_2299     | AT3G49500 | GATCTTCCAACGGAGTAGCG        | 120              | <i>pRDR6</i>                   |
| RT_2300     |           | CCCTCTGACCCCATTTCTC         |                  | region 4                       |
| RT_0045     | AT5G09810 | CGTTTCGCTTTCCTTAGTGTTAGCT   | 134              | <i>ACT 7</i>                   |
| RT_0046     |           | AGCGAACGGATCTAGAGACTCACCTTG |                  |                                |
| RT_0795     | AT5G18000 | GGGAAGGTCATGGCAAGTTA        | 170              | <i>pVDD</i>                    |
| RT_0796     |           | CCATCTGCCTCGAATATGGT        |                  |                                |
| RT_2915     | AT4G27330 | ccaagattaacatggaggca        |                  | <i>pSPL reg 1</i><br><i>fw</i> |
| RT_2916     |           | ctcactatacttagctgac         |                  | <i>pSPL reg 1</i><br><i>rv</i> |
| RT_2917     | AT4G27330 | gtctgagtgttaggttag          |                  | <i>SPL 3-UTR</i><br><i>fw</i>  |
| RT_2918     |           | CCATTGATTTGTCCTTGAAGC       |                  | <i>SPL 3-UTR</i><br><i>rv</i>  |

Table S5. Primers used for cloning

| Primer name | Gene                         | Sequence                                              | Amplificate size | Objective            |
|-------------|------------------------------|-------------------------------------------------------|------------------|----------------------|
| ATP_6475    | AT4G27330                    | GGGGACAAGTTTGTACAAAAAAGCAGGCTcaATGGCGACTTCTCTCTTCTTC  | 1171             | SPL locus            |
| ATP_6476    | AT4G27330                    | GGGGACCACTTTGTACAAGAAAGCTGGGTcGAAGCTTCAAGGACAAATCAATG |                  | SPL locus            |
| ATP_6548    | GFP                          | GGGGACCACTTTGTACAAGAAAGCTGGGTC TCACTTGTACAGCTCGTCCAT  | 1850             | SPL-GFP              |
| ATP_6234    | 5'_AT4G27330                 | GGGGACAACCTTTGTATAGAAAAGTTGtagaatgcaatacatggctg       | 3906             | 5'SPL (attB4)        |
| ATP_6235    | 5'_AT4G27330                 | GGGGACTGCTTTTTTGTACAAACTTGtgatgatgatcttctctcgga       |                  | 5'SPL (attB1r)       |
| ATP_6236    | 3'_AT4G27330                 | GGGGACAGCTTTCTTGTACAAAGTGGatgtttatcttctatattg         | 1609             | 3'SPL (attB2r)       |
| ATP_6237    | 3'_AT4G27330                 | GGGGACAACCTTTGTATAATAAAGTTGgatcgtcttcttctctctctgc     |                  | 3'SPL (attB3)        |
| ATP_1575    | $\beta$ -glucuronidase (GUS) | CCACTGTTACGTCCTGTAGAAACCCC                            | 1809             | GUS for TOPO cloning |
| ATP_1576    | $\beta$ -glucuronidase (GUS) | TCATTGTTTGCCTCCCTGCTG                                 |                  | GUS rev              |
| ATP_4196    | AT4G27330                    | GGGGACAAGTTTGTACAAAAAAGCAGGCTTCATGGCGACTTCTCTCTTCTTC  | 945              | SPL CDS fw           |
| AtP_4197    | AT4G27330                    | GGGGACCACTTTGTACAAGAAAGCTGGGTTTAAAGCTTCAAGGACAAATC    |                  | SPL CDS rv           |
